# Supplementary material for: Discrete element modelling of tomato tissue deformation and failure at the cellular scale
Source: Royal Society of Chemistry journal article supplement (doi:10.1039/c9sm00149b), 2019-01-01
Supplement: c9sm00149b1.pdf [file c9sm00149b1.pdf]

## Electronic Supplementary Information

### Movie captions

**Movie 1** Cross-section of a virtual tissue structure of tomato mesocarp tissue of 1.5% porosity during a compression test simulation. Cells that have ruptured become highlighted in red.

**Movie 2** Cross-section of a virtual tissue structure of tomato mesocarp tissue of 1.5% porosity during a tensile test simulation. Cells that have ruptured become highlighted in red.
